# Supplementary material for: Isoquinolino[4,3,2-de]phenanthridine: synthesis and its use in 1,3-dipolar cycloadditions to form nitrogen-containing polyaromatic hydrocarbons
Source: Royal Society of Chemistry journal article supplement (doi:10.1039/c4cc06643j), 2014-11-04
Supplement: c4cc06643j2.zip [file c4cc06643j2.zip]

## checkCIF/PLATON (standard)

You have not supplied any structure factors. As a result the full set of tests cannot be run.

No syntax errors found.  
Please wait while processing ....

[CIF dictionary](#)  
[Interpreting this report](#)

## Datablock: 9APDMCPA

|                        |                                    |                                 |
|------------------------|------------------------------------|---------------------------------|
| Bond precision:        | C-C = 0.0041 Å                     | Wavelength=0.71075              |
| Cell:                  | a=9.666(3) b=22.449(6) c=29.445(8) |                                 |
|                        | alpha=90 beta=90 gamma=90          |                                 |
| Temperature:           | 93 K                               |                                 |
|                        | Calculated                         | Reported                        |
| Volume                 | 6389(3)                            | 6389(3)                         |
| Space group            | P b c a                            | Pbca                            |
| Hall group             | -P 2ac 2ab                         | ?                               |
| Moiety formula         | C42 H33 N O4                       | ?                               |
| Sum formula            | C42 H33 N O4                       | C42 H33 N O4                    |
| Mr                     | 615.69                             | 615.69                          |
| Dx, g cm <sup>-3</sup> | 1.280                              | 1.280                           |
| Z                      | 8                                  | 8                               |
| Mu (mm <sup>-1</sup> ) | 0.082                              | 0.082                           |
| F000                   | 2592.0                             | 2592.0                          |
| F000'                  | 2593.15                            |                                 |
| h,k,lmax               | 11,26,35                           | 11,26,35                        |
| Nref                   | 5629                               | 5622                            |
| Tmin,Tmax              | 0.985,0.992                        | 0.976,0.992                     |
| Tmin'                  | 0.976                              |                                 |
| Correction method=     | MULTI-SCAN                         |                                 |
| Data completeness=     | 0.999                              | Theta(max)= 25.000              |
| R(reflections)=        | 0.0799( 5262)                      | wR2(reflections)= 0.1455( 5622) |
| S =                    | 1.301                              | Npar= 429                       |

The following ALERTS were generated. Each ALERT has the format

**test-name\_ALERT\_alert-type\_alert-level.**

Click on the hyperlinks for more details of the test.

### ● Alert level C

[PLAT340\\_ALERT\\_3\\_C](#) Low Bond Precision on C-C Bonds ..... 0.0041 Ång.

### ● Alert level G

[PLAT005\\_ALERT\\_5\\_G](#) No \_iucr\_refine\_instructions\_details in the CIF Please Do !

[PLAT066\\_ALERT\\_1\\_G](#) Predicted and Reported Tmin&Tmax Range Identical ? Check

[PLAT083\\_ALERT\\_2\\_G](#) SHELXL Second Parameter in WGHT Unusually Large. 8.01 Report

- 0 **ALERT level A** = Most likely a serious problem - resolve or explain
- 0 **ALERT level B** = A potentially serious problem, consider carefully
- 1 **ALERT level C** = Check. Ensure it is not caused by an omission or oversight
- 3 **ALERT level G** = General information/check it is not something unexpected

- 1 ALERT type 1 CIF construction/syntax error, inconsistent or missing data
- 1 ALERT type 2 Indicator that the structure model may be wrong or deficient
- 1 ALERT type 3 Indicator that the structure quality may be low
- 0 ALERT type 4 Improvement, methodology, query or suggestion
- 1 ALERT type 5 Informative message, check

It is advisable to attempt to resolve as many as possible of the alerts in all categories. Often the minor alerts point to easily fixed oversights, errors and omissions in your CIF or refinement strategy, so attention to these fine details can be worthwhile. In order to resolve some of the more serious problems it may be necessary to carry out additional measurements or structure refinements. However, the purpose of your study may justify the reported deviations and the more serious of these should normally be commented upon in the discussion or experimental section of a paper or in the "special\_details" fields of the CIF. checkCIF was carefully designed to identify outliers and unusual parameters, but every test has its limitations and alerts that are not important in a particular case may appear. Conversely, the absence of alerts does not guarantee there are no aspects of the results needing attention. It is up to the individual to critically assess their own results and, if necessary, seek expert advice.

### Publication of your CIF in IUCr journals

A basic structural check has been run on your CIF. These basic checks will be run on all

CIFs submitted for publication in IUCr journals (*Acta Crystallographica*, *Journal of Applied Crystallography*, *Journal of Synchrotron Radiation*); however, if you intend to submit to *Acta Crystallographica Section C* or *E*, you should make sure that [full publication checks](#) are run on the final version of your CIF prior to submission.

### Publication of your CIF in other journals

Please refer to the *Notes for Authors* of the relevant journal for any special instructions relating to CIF submission.

PLATON version of 24/07/2014; check.def file version of 24/07/2014

## Datablock 9APDMCPA - ellipsoid plot

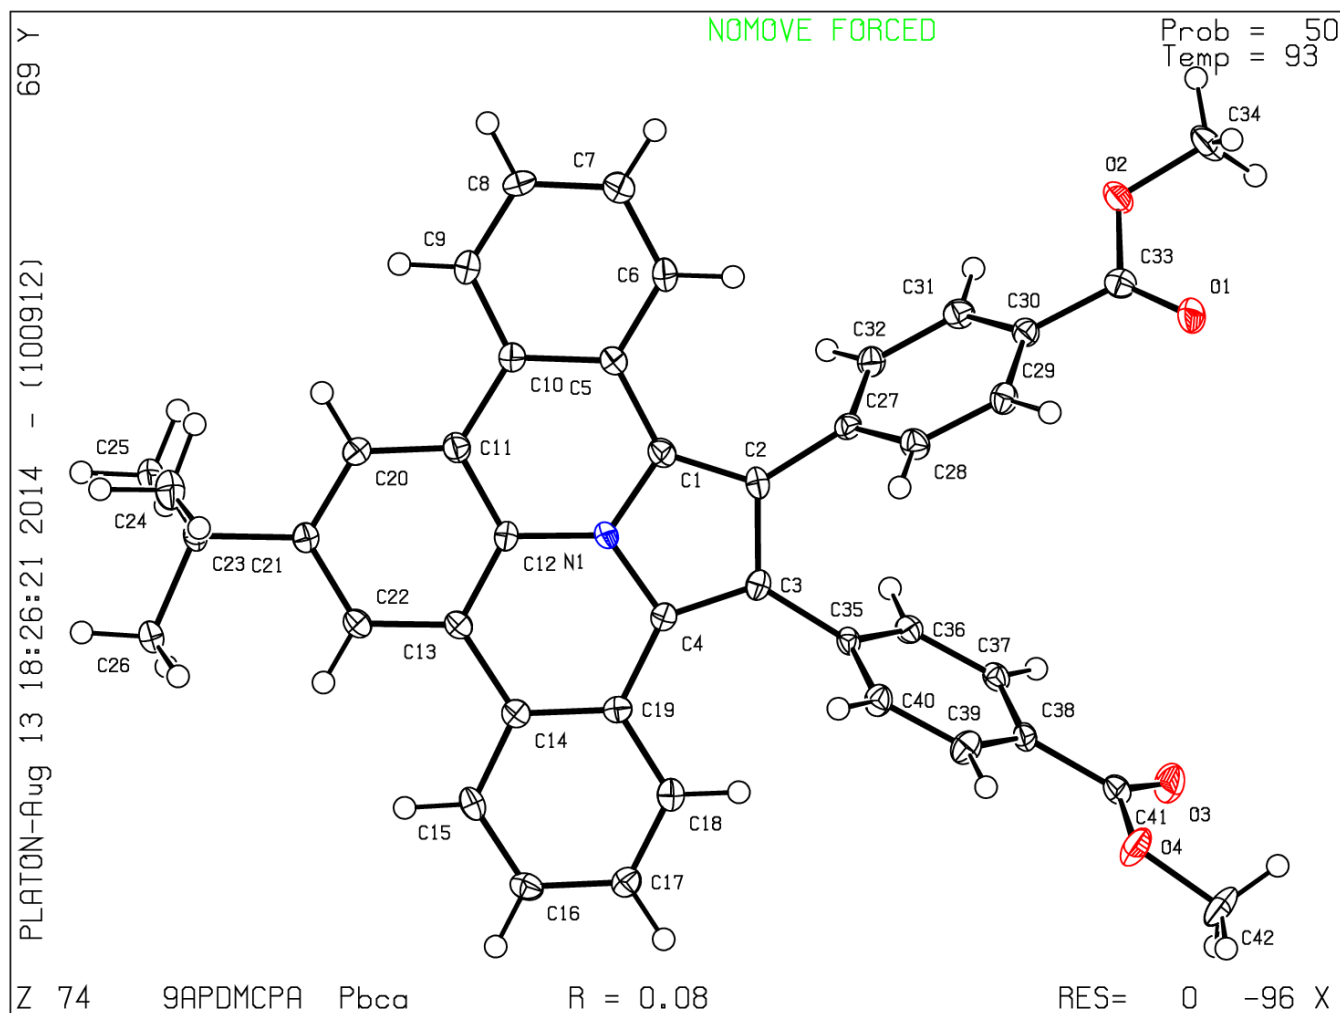

---

[Download CIF editor \(publCIF\) from the IUCr](#)  
[Download CIF editor \(enCIFer\) from the CCDC](#)  
[Test a new CIF entry](#)
